# Supplementary material
Source: Springer Nature journal article supplement (https://www.springermedizin.de/resource/supplementary/13098_2014_388_MOESM4_ESM.pdf/9670962)
Supplement: MOESM4 [file 9670962]

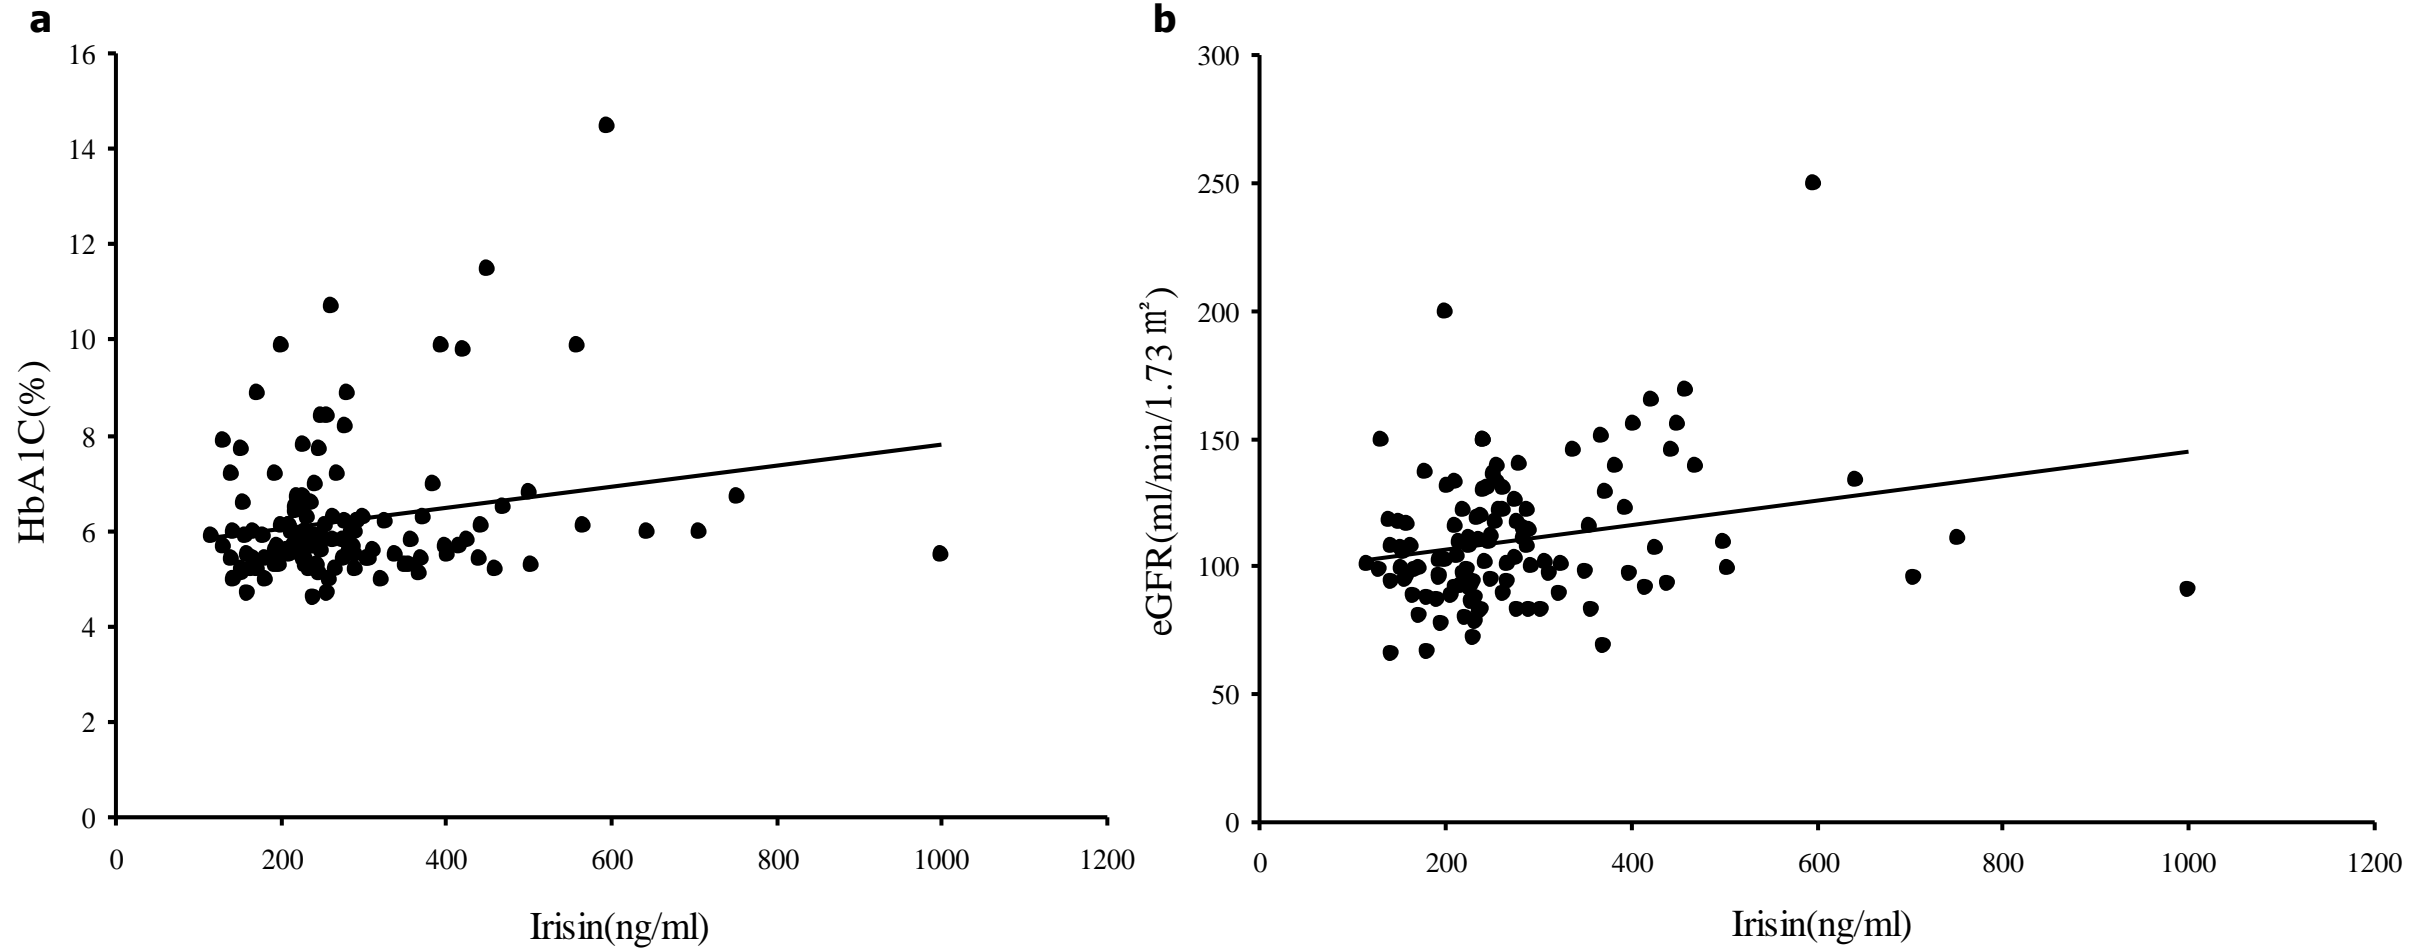

Figure 1 | The correlation analysis between HbA1C and eGFR and circulating irisin. Pearson bivariate correlation analysis showed that HbA1C ( $r=0.202$ ,  $p=0.026$ ) and eGFR ( $r=0.239$ ,  $p=0.010$ ) were positively correlated with circulating irisin, the figures were presented in Fig. 1a, b.
